# Supplementary material
Source: PubMed Central journal article supplement (PMC4772869)

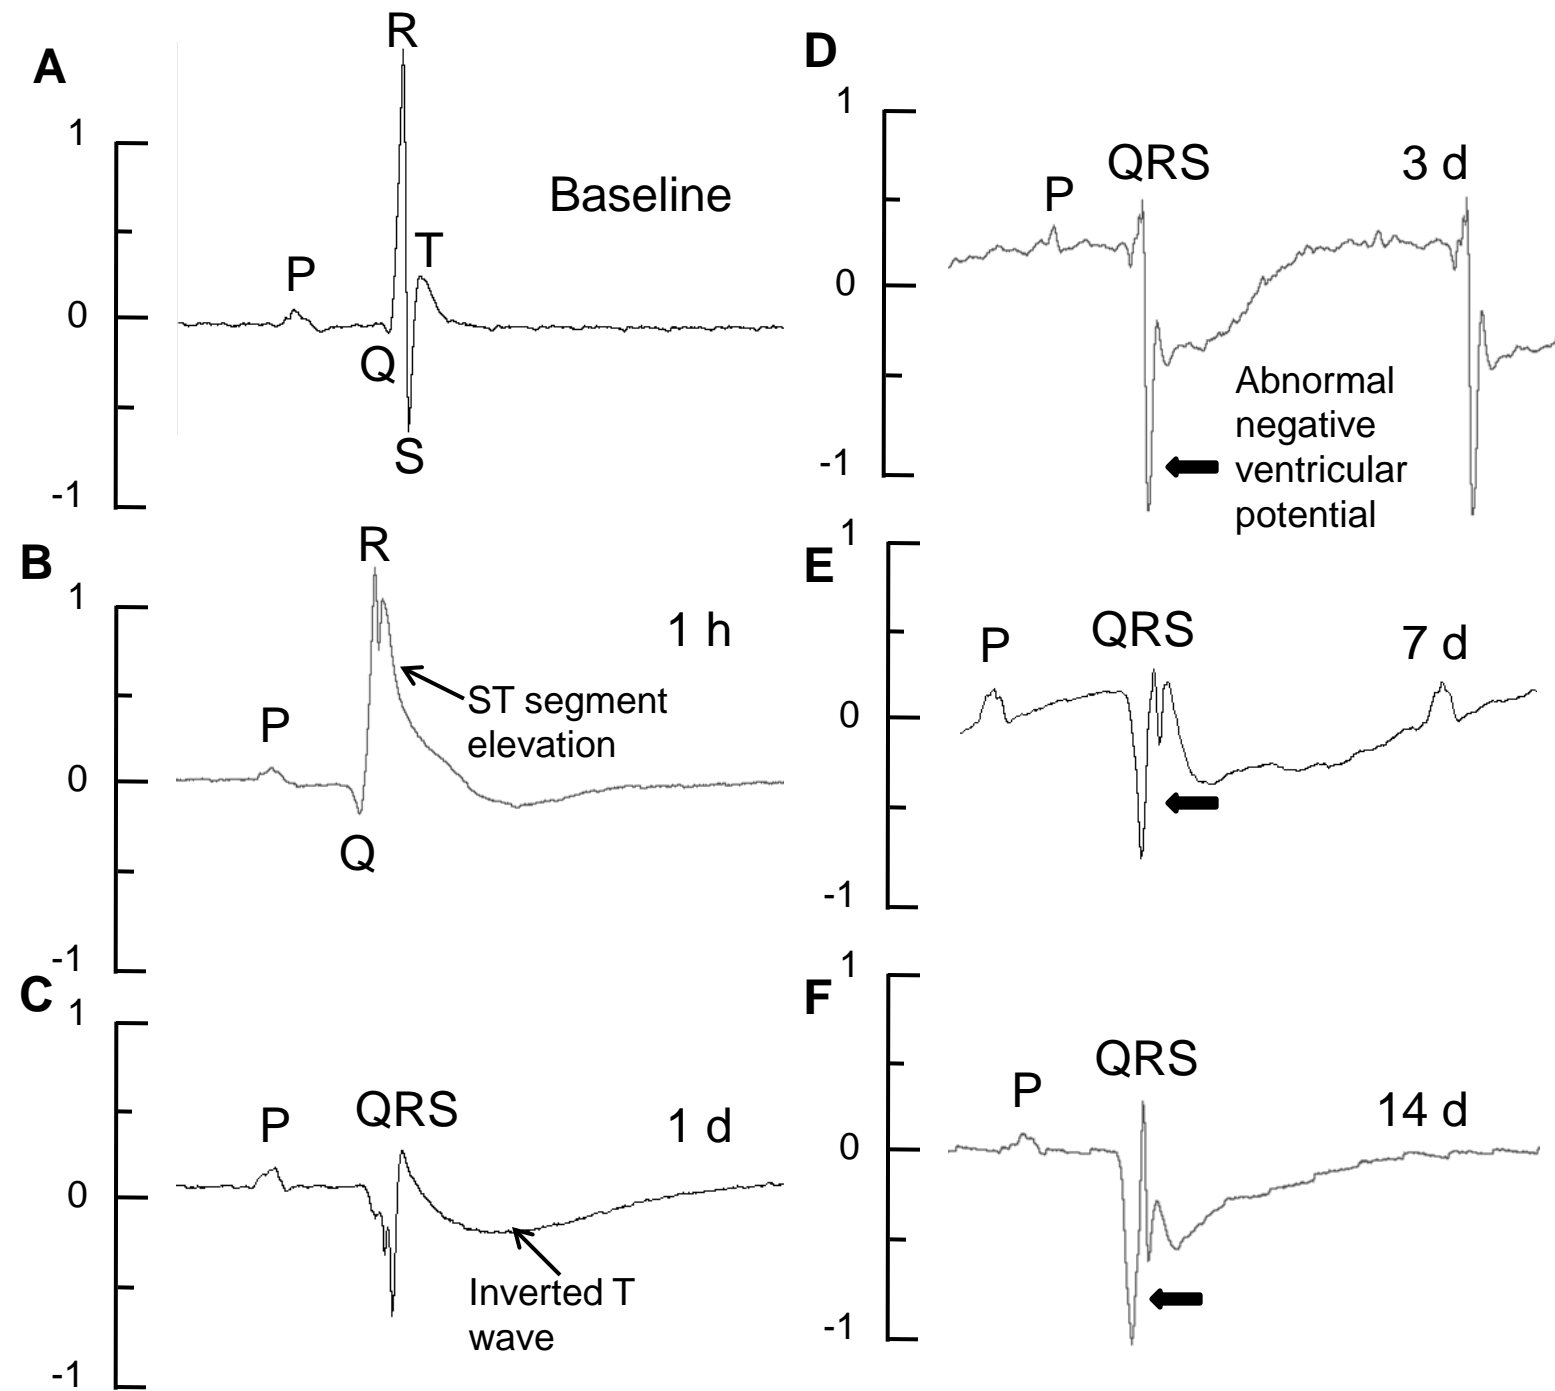

Figure S1

Supplement: NIHMS218042-supplement-01.pdf [file NIHMS218042-supplement-01.pdf]
